# Supplementary material for: Hydromorphone ameliorates endotoxin-induced acute lung injury by suppressing ferroptosis via Nrf2/HO-1 signaling pathway
Source: Research Square preprint supplement (doi:10.21203/rs.3.rs-7370812/v1), 2025-10-16

figure 2 GPX4

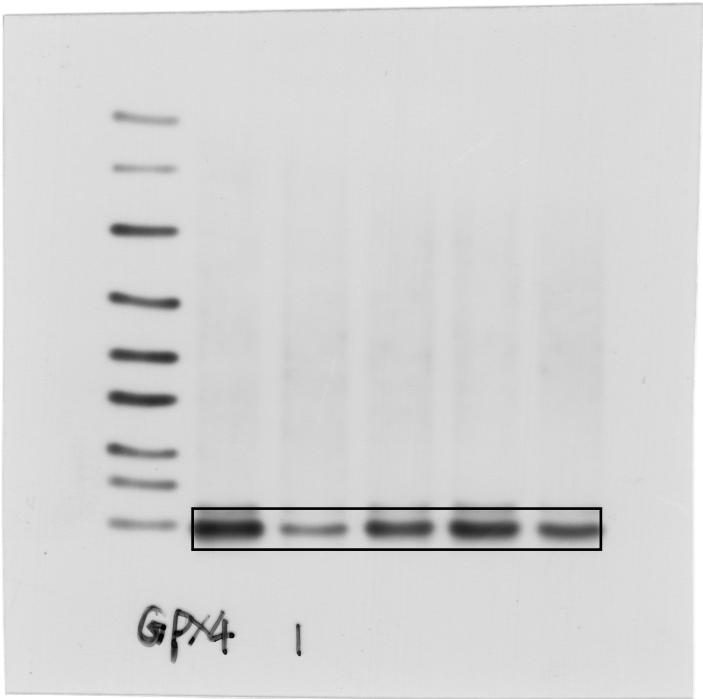

figure 2 PTGS2

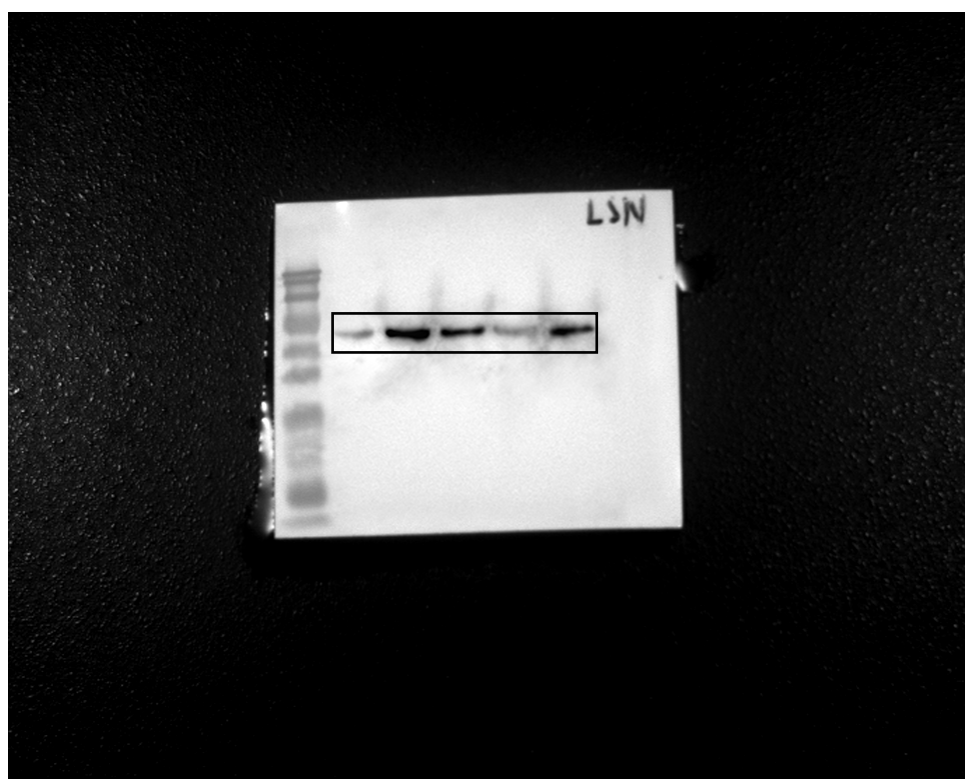

figure 2 4-HNE

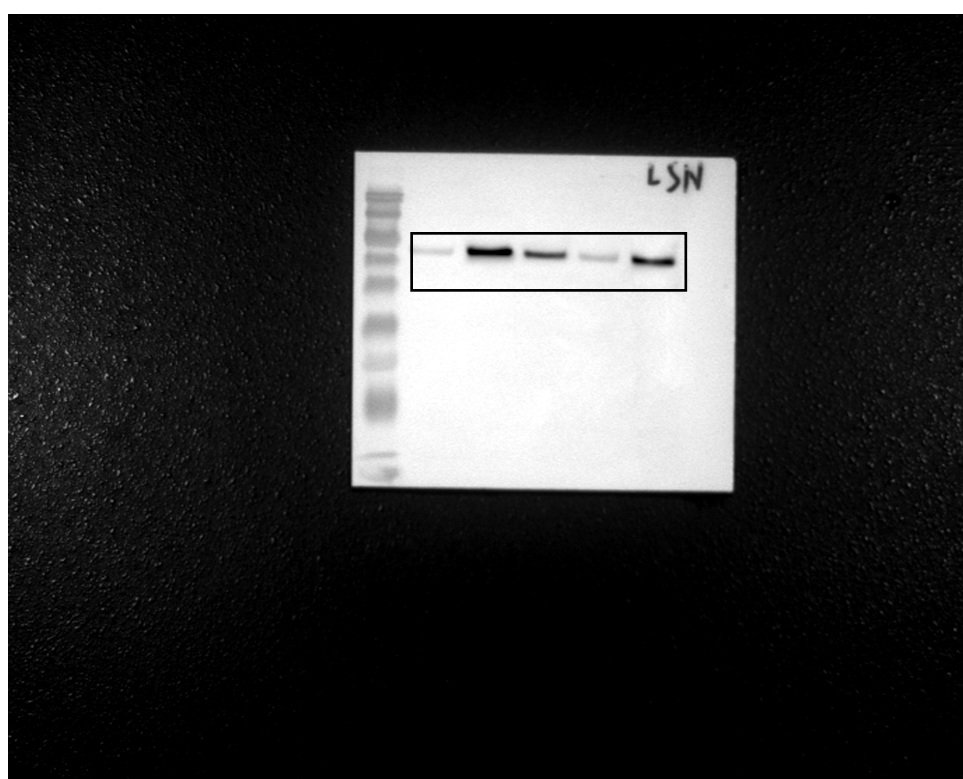

figure 2 -actin

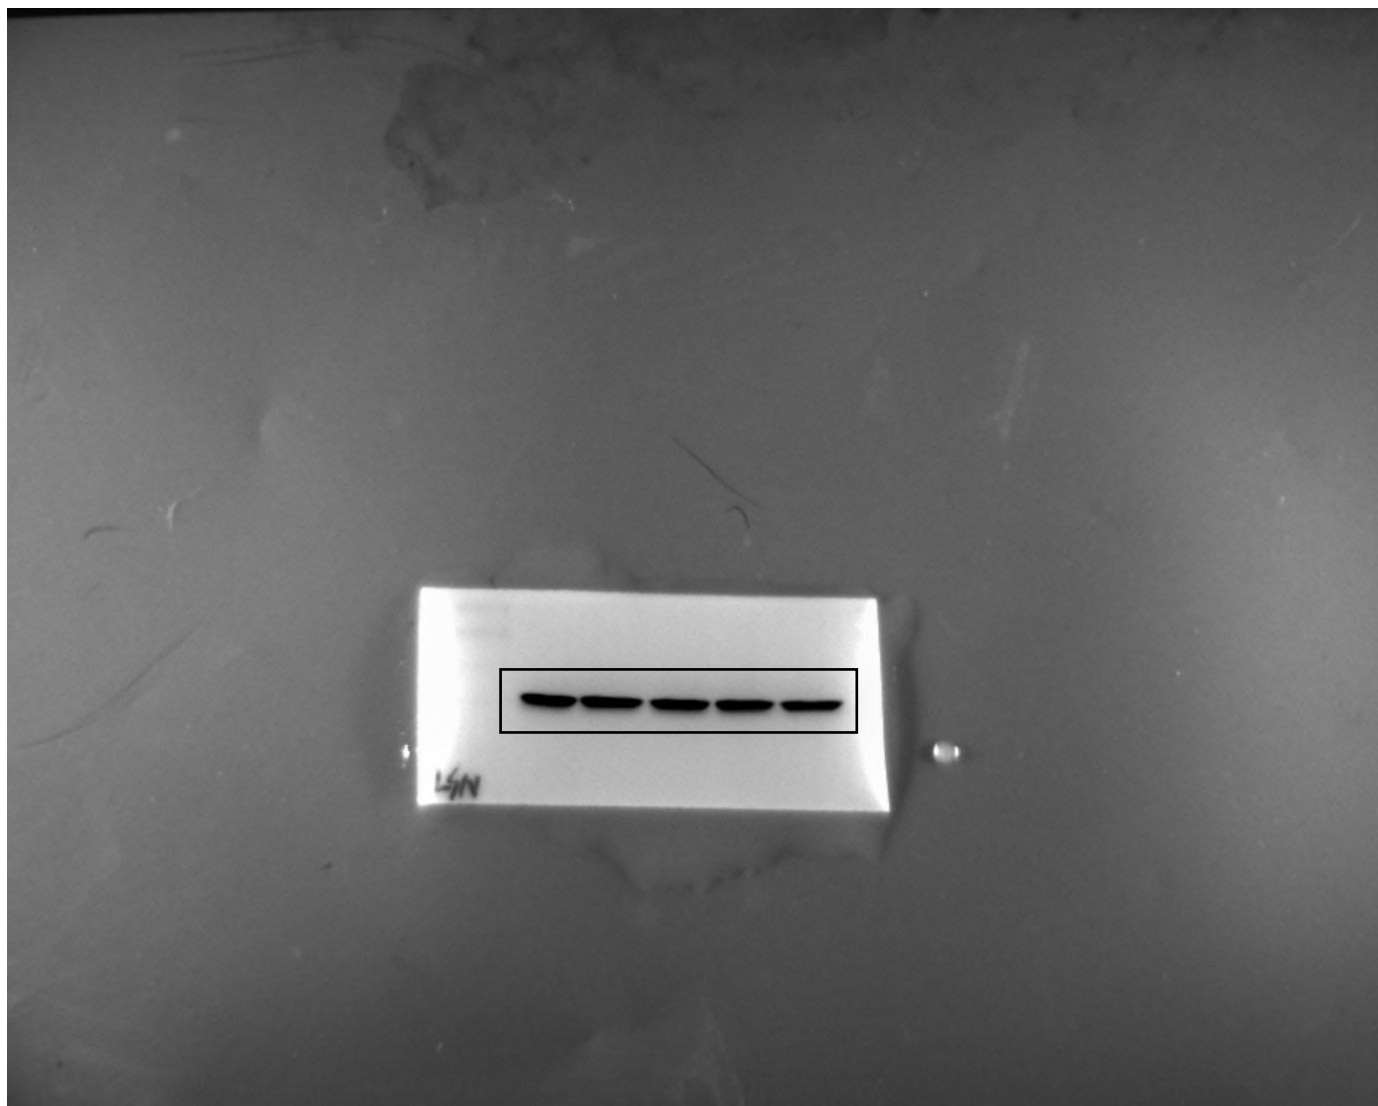

figure 4 GPX4

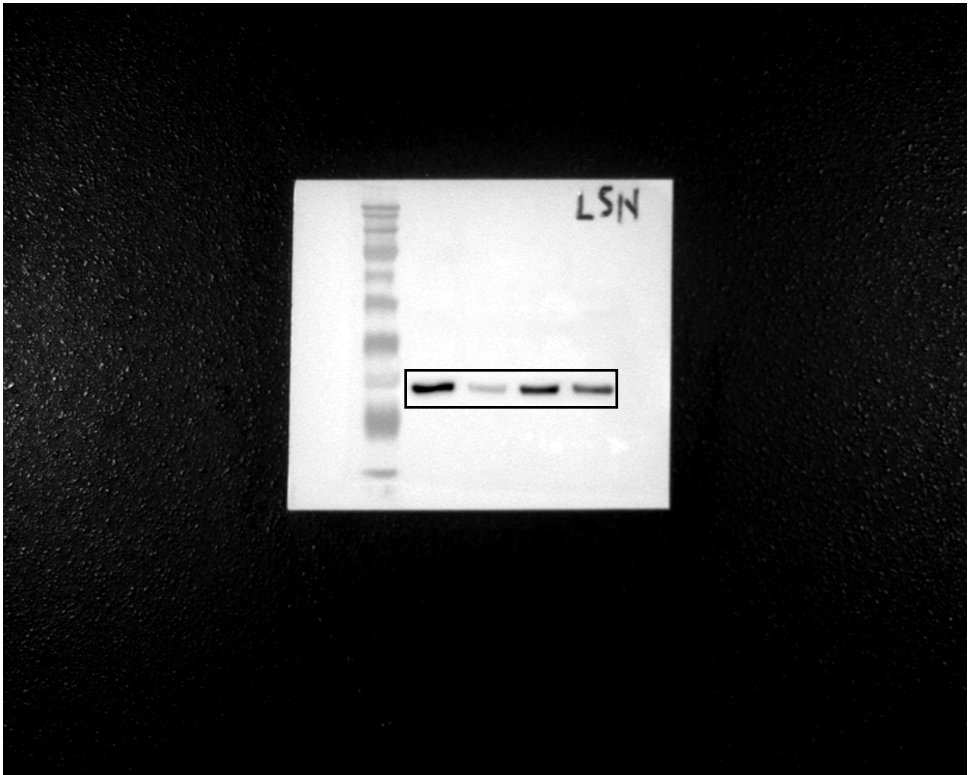

figure 4 PTGS2

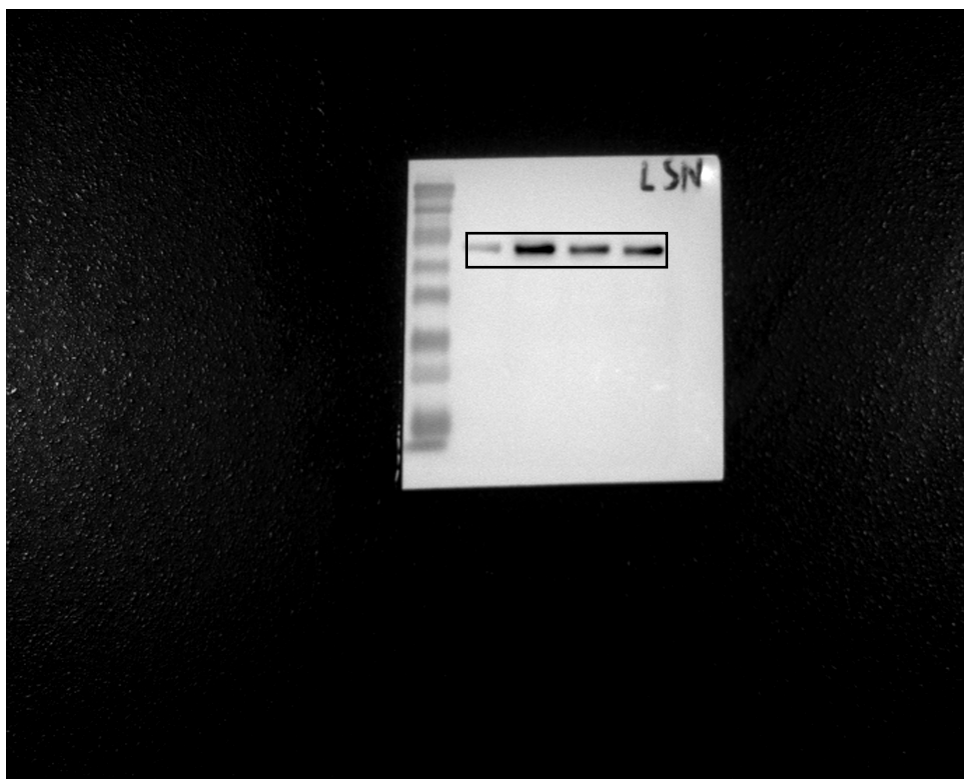

figure 4 4-HNE

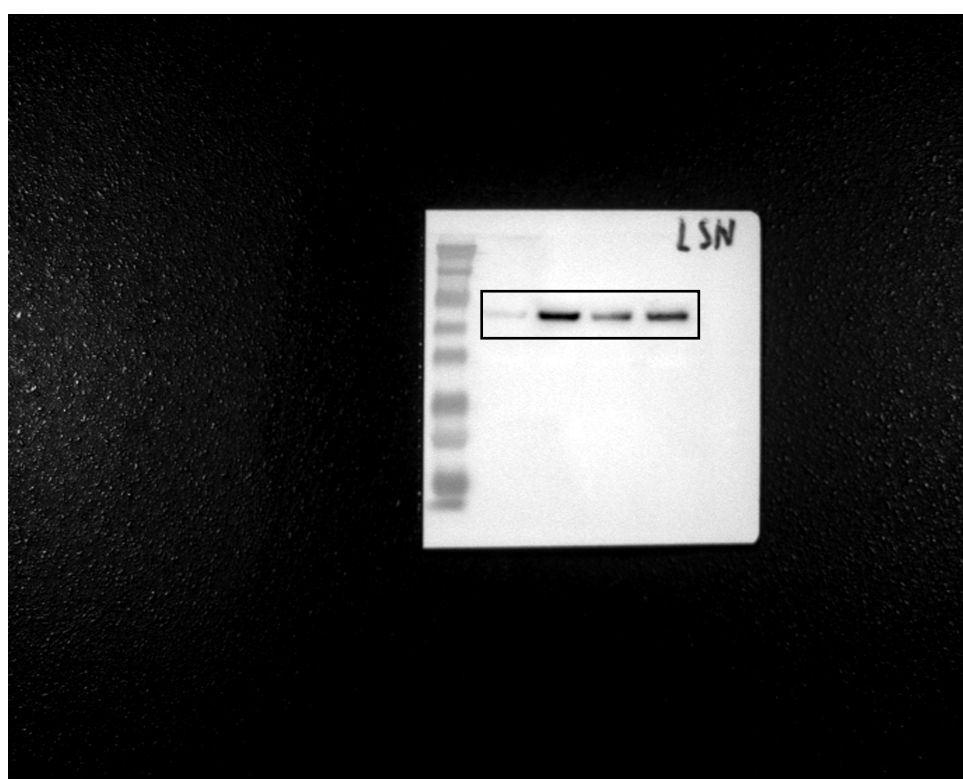

figure 4    -actin

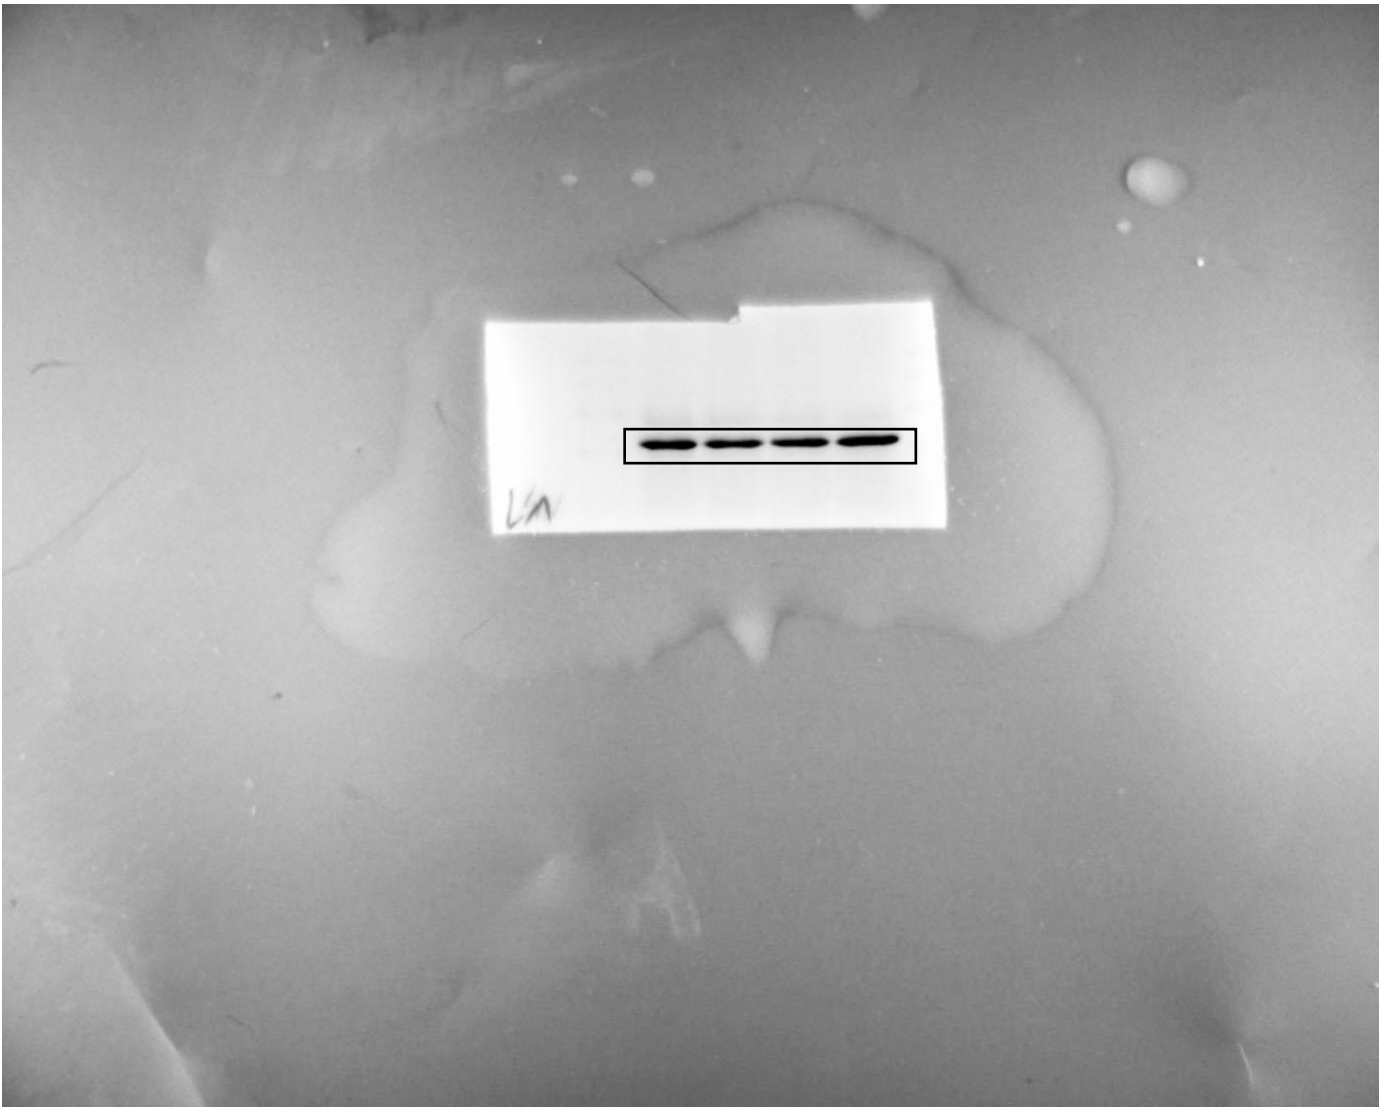

figure 5 GPX4

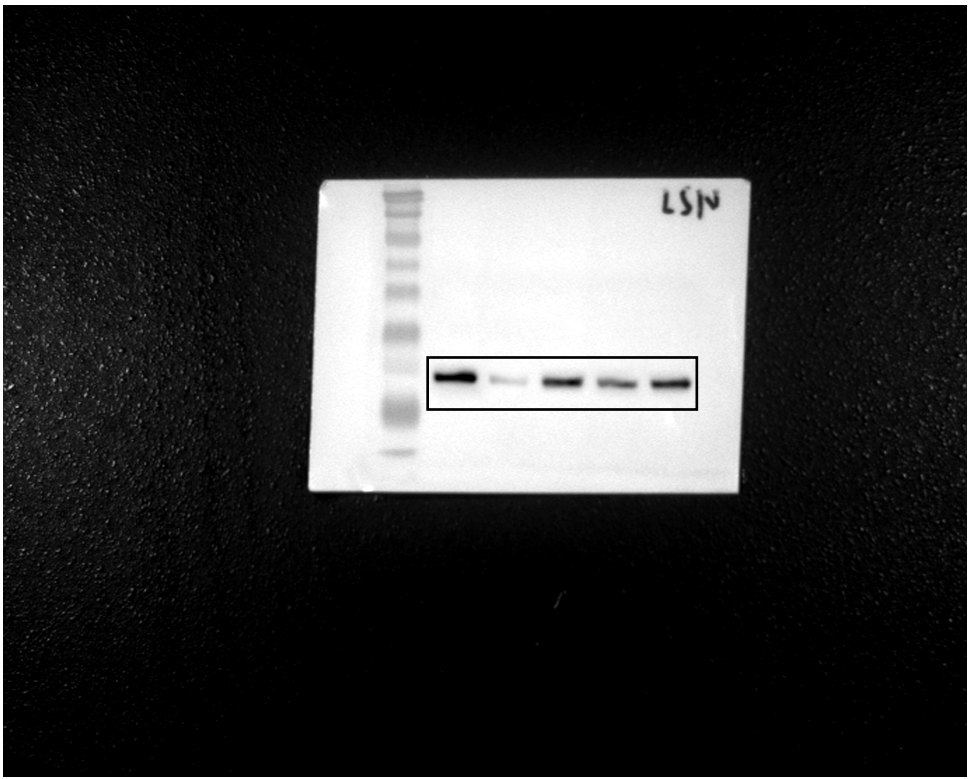

figure 5 PTGS2

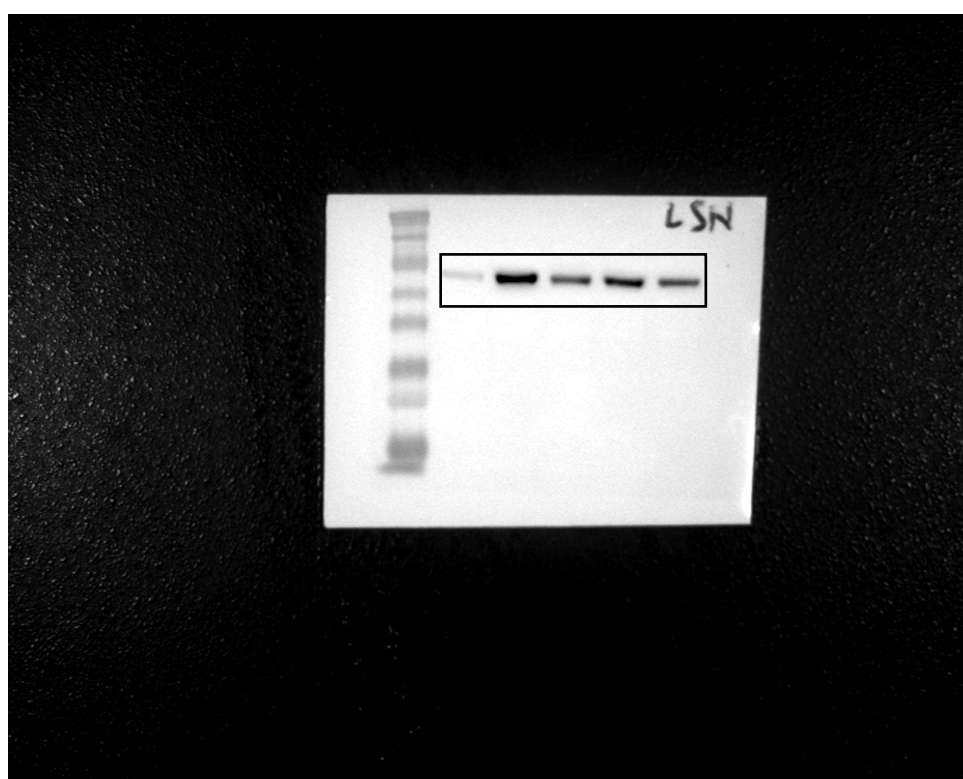

figure 5 4-HNE

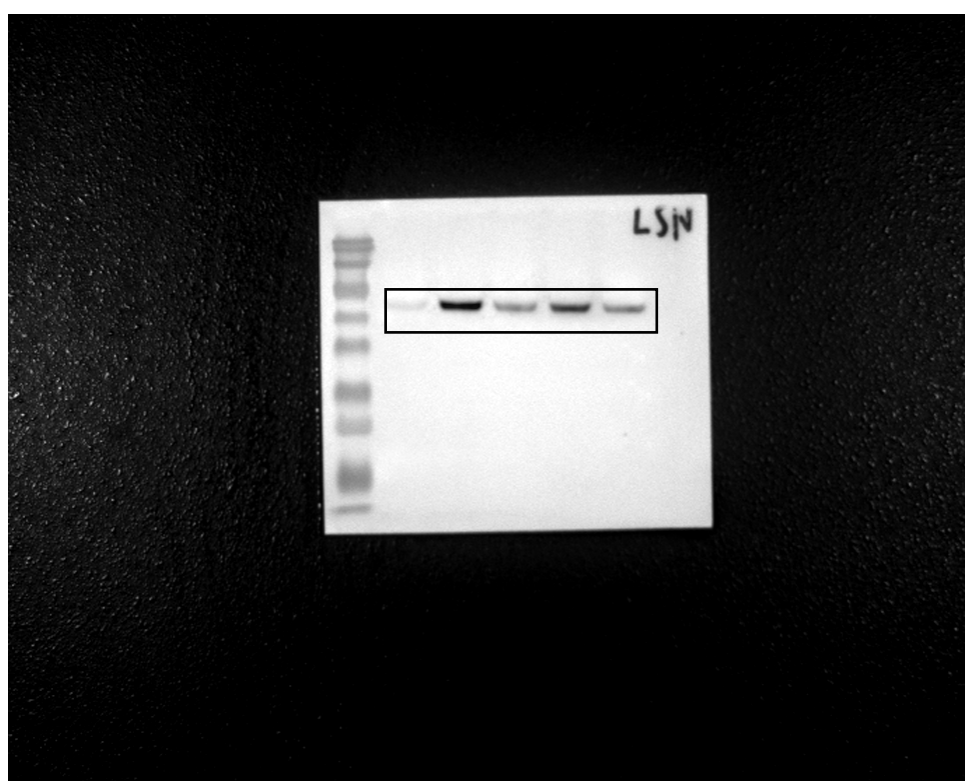

figure 5 Nrf2

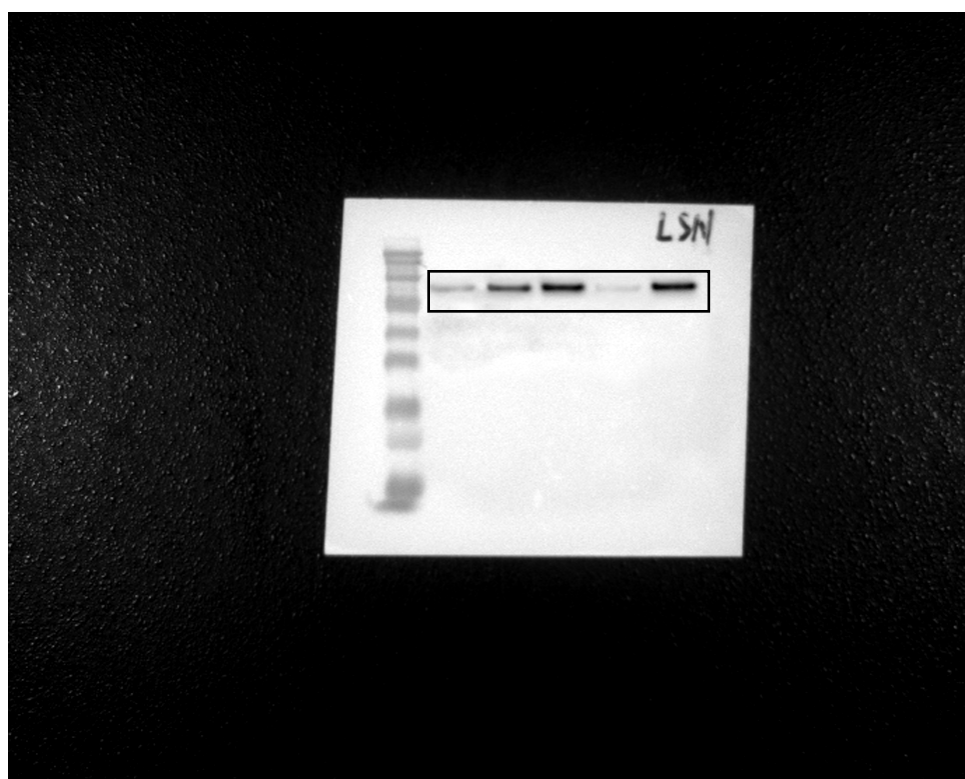

figure 5 H0-1

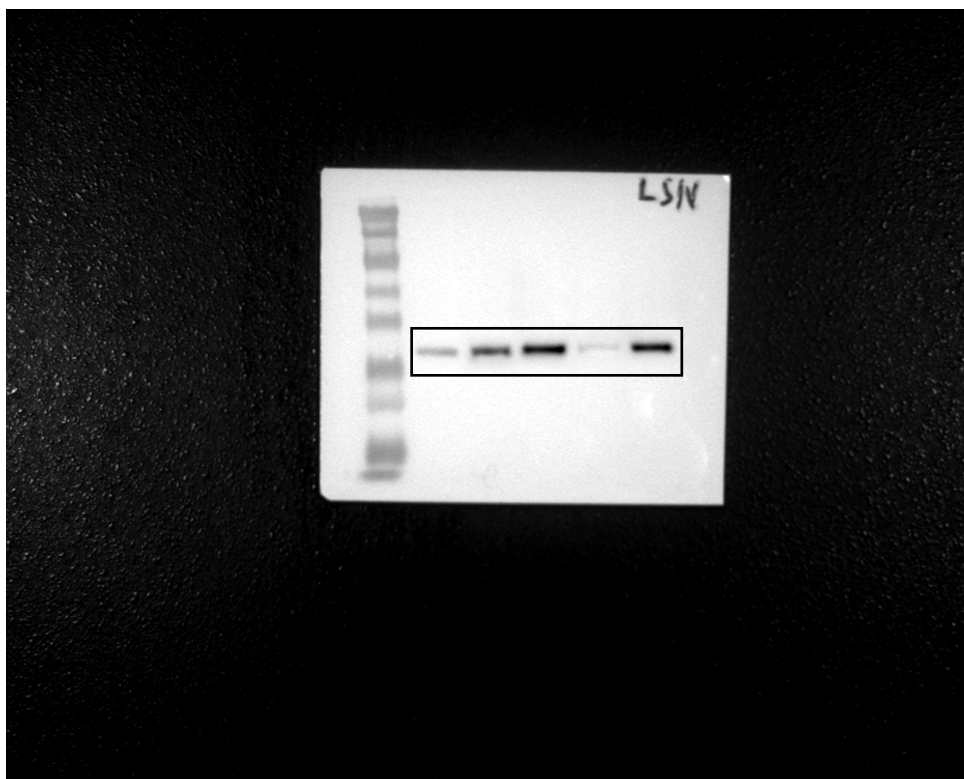

figure 5 -actin

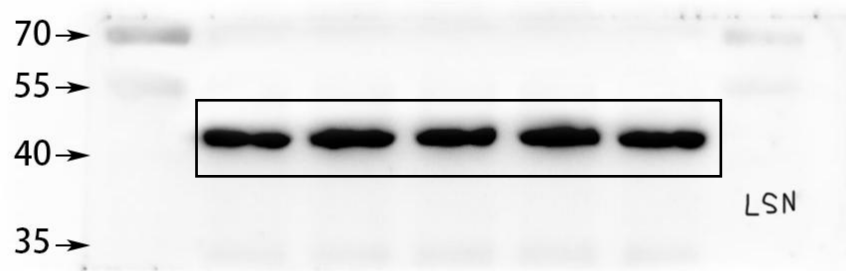

figure 6 GPX4

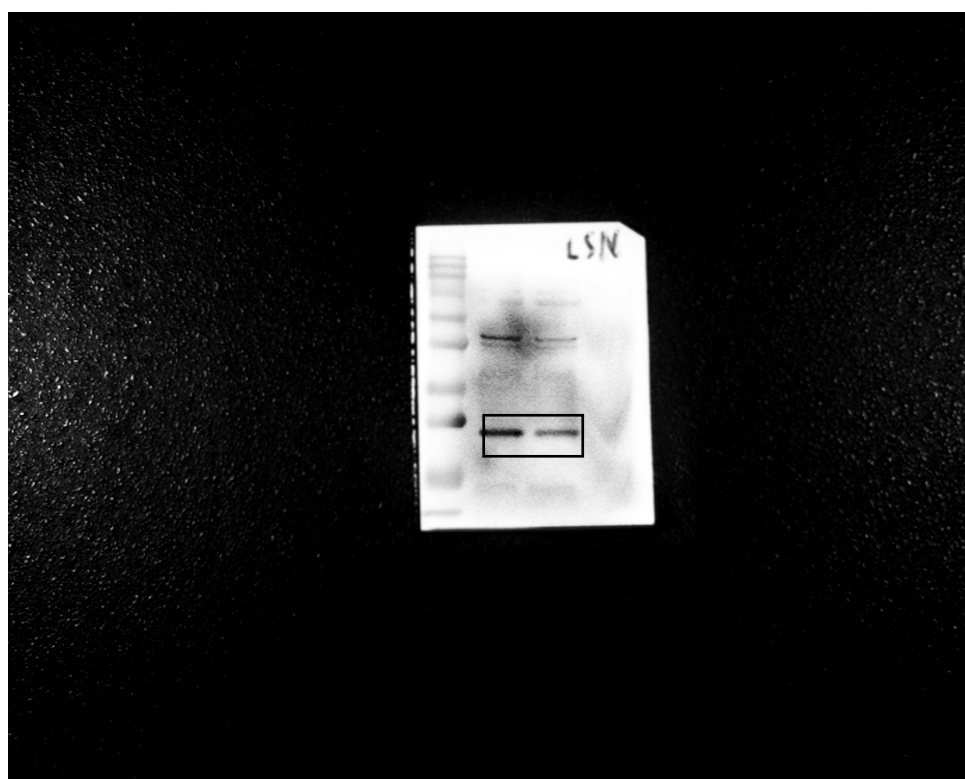

figure 6 PTGS2

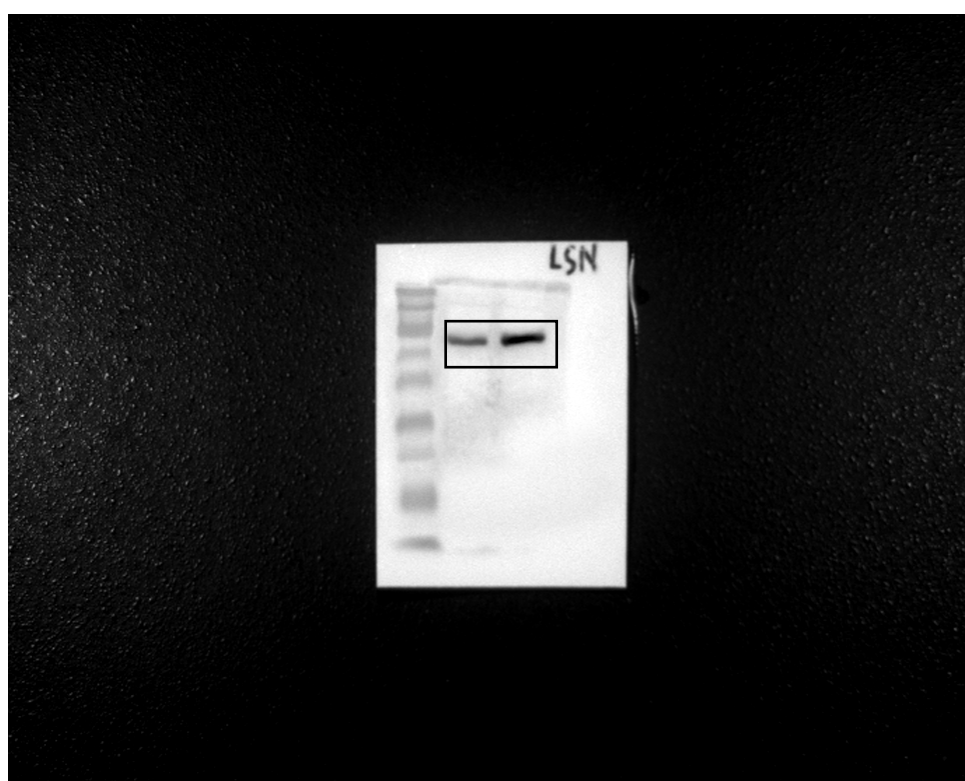

figure 6 4-HNE

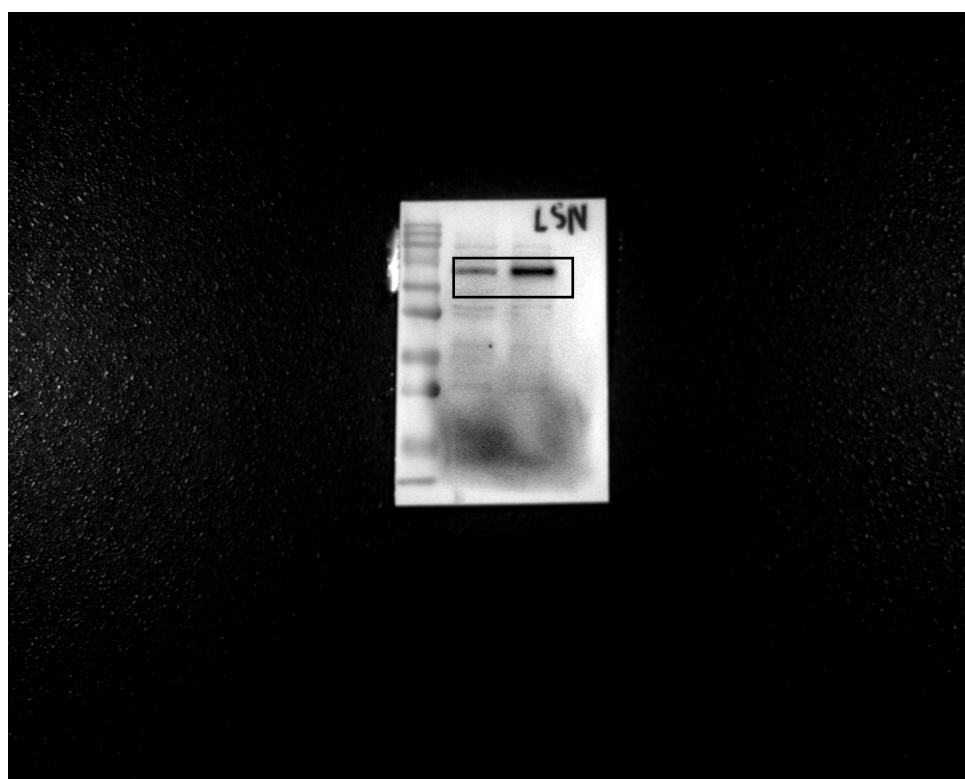

figure 6 Nrf2

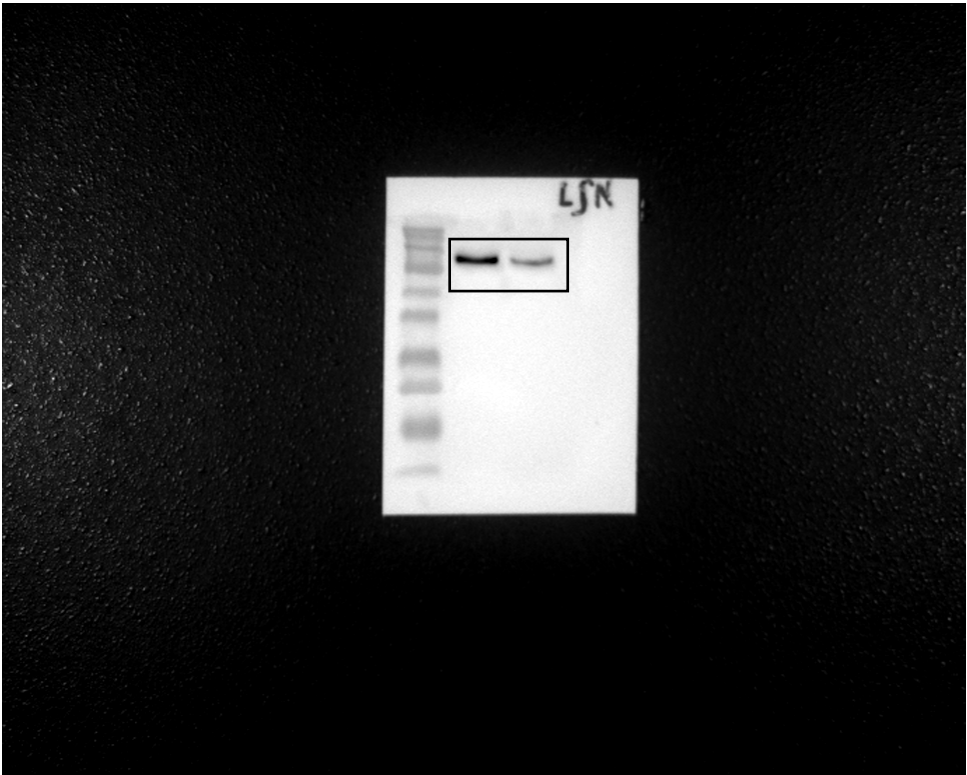

figure 6 H0-1

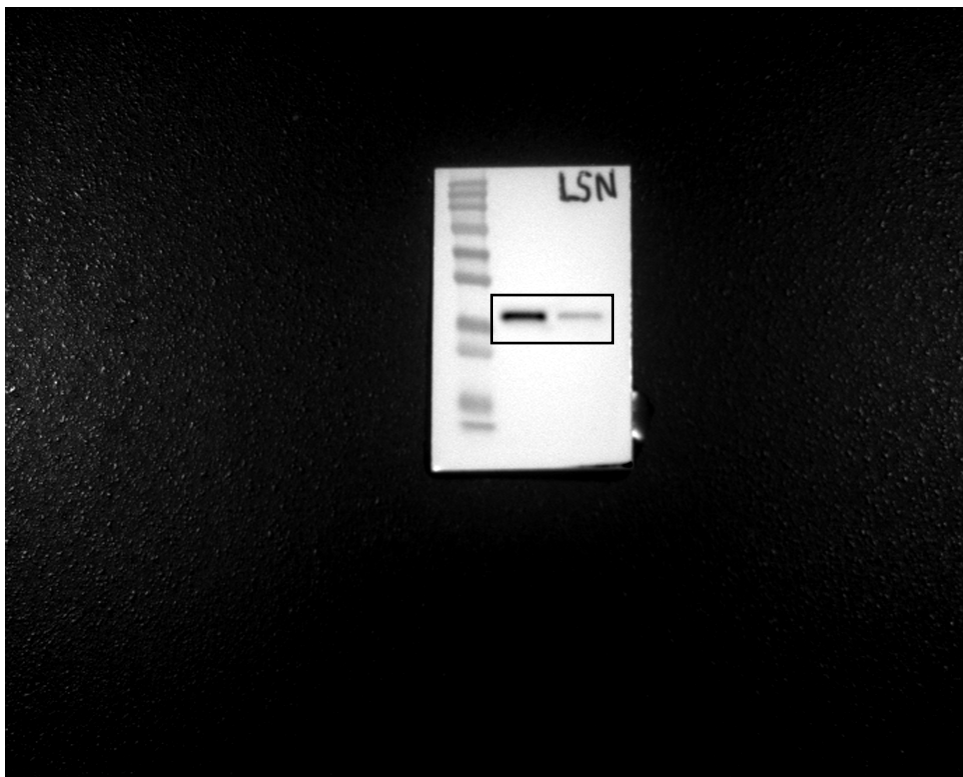

figure 6  $\alpha$ -actin

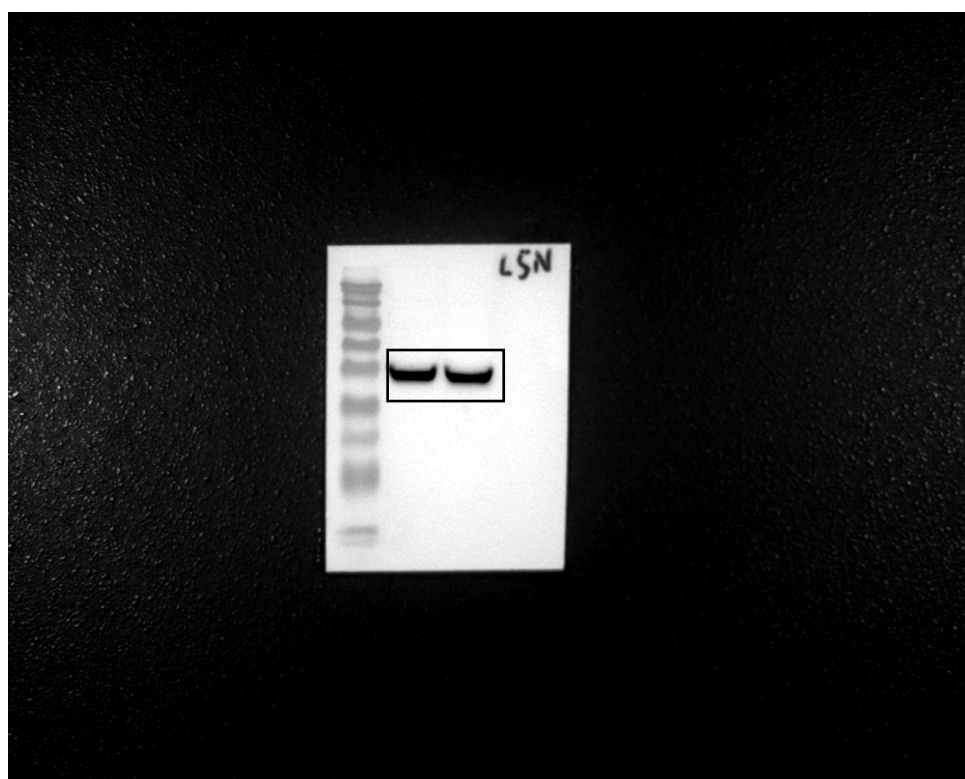

Supplement: Supplementary file 1 [file 4d0d7cbe8d9a697cb61a4f49.pdf]
